# Supplementary material
Source: publisher figshare collection journal article supplement (https://geolsoc.figshare.com/ndownloader/files/28690567)
Supplement: Supplementary file 1 [file 28690567]

## Sheet: Table A1 - Petrography
Supplemental Document 1 - Petrography
Transcrustal Magmatic Systems: Evidence from Andesites of the Southern Taupo Volcanic Zone
Journal of the Geological Society
Christopher Svoboda (Michigan State University); Tyrone Rooney (Michigan State University); Guillaume Girard (Northern Illinois University);
Chad Deering (Michigan Technological University)
Corresponding Author: Christopher Svoboda svoboda6@msu.edu
			Thin Section Totals					Groundmass Composition					Textures
Sample Name	Location	Stratigraphic Position	Pheno %	GM %	Large Void %	Total Vesicularity %*	Total Crystallinity %**	GM Glass %	GM Plag %	GM Cpx %	GM Void%	GM Color	Glomero-porphyritic	Coronae	Quartz Xenolith
5021A	Ohakune - Scoria Cone	1 (bottom)	5	90	5	45	15	45	7	3	45	Red-brown	Yes	Yes	Yes
5021B	Ohakune - Scoria Cone	2	10	80	10	50	20	40	8	2	50	Red-brown	Yes		Yes
5021C	Ohakune - Scoria Cone	3	20	79	1	20	55	30	35	10	25	Red-brown	Yes		Yes
5021D	Ohakune - Scoria Cone	4	5	90	5	20	40	40	30	10	20	Red-brown	Yes	Yes	Yes
5021E	Ohakune - Scoria Cone	5	3	92	5	50	10	40	5	5	50	Red-brown	Yes		Yes
5021F	Ohakune - Scoria Cone	6	15	75	10	50	35	25	25	0	50	Golden	Yes	Yes
5021G-B	Ohakune - Scoria Cone	7	20	79	1	30	60	10	40	10	40	Black	Yes	Yes
5021I	Ohakune - Scoria Cone	8 (top)	20	60	20	55	30	25	8	7	60	Black	Yes
*Total Vesicularity is calculated as percentage of groundmass vesicles (column L) normalized to the percentage of the thin section that is groundmass (column E), then added to percentage of large voids (column F). This value is then rounded to the nearest 5%.
*Total Crystallinity is calculated as percentage phenocrysts (column D) added to percentage groundmass that is crystals (the sum of columns J and K) normalized to the percentage of the thin section that is groundmass (column E). This value is then rounded to the nearest 5%
Abbreviations:
Pheno = Phenocryst
GM = Groundmass
Plag = Plagioclase
Cpx = Clinopyroxene
